# Supplementary material for: Sustainable production of ZnO nanoparticles via capparis decidua stem extract for efficient photocatalytic Rh 6G dye degradation
Source: Royal Society of Chemistry journal article supplement (doi:10.1039/d5ra05878c), 2025-01-01
Supplement: d5ra05878c1.pdf [file d5ra05878c1.pdf]

# **Sustainable Production of ZnO Nanoparticles via *Capparis* *Decidua* Stem Extract for Efficient Photocatalytic Rh 6G Dye Degradation**

**Asmaa M. Sayed<sup>a</sup>, Fawzy M. Salam<sup>a</sup>, Hanaa K. Galal<sup>a</sup>, and Mohamed I. Said<sup>b,\*</sup>**

<sup>a</sup> Department of Botany and Microbiology, Faculty of Science, Assiut University, Egypt

<sup>b</sup> Department of Chemistry, Faculty of Science, Assiut University, Egypt

**\* Corresponding author**

**e-mail:** [moh\\_chem1@yahoo.com](mailto:moh_chem1@yahoo.com)

[mohamedali123@aun.edu.eg](mailto:mohamedali123@aun.edu.eg)

## ***Keywords***

***Capparis Decidua; Green Synthesis; Plant Extract; Zinc Oxide NPs; Optical Properties; Rhodamine 6G Removal.***

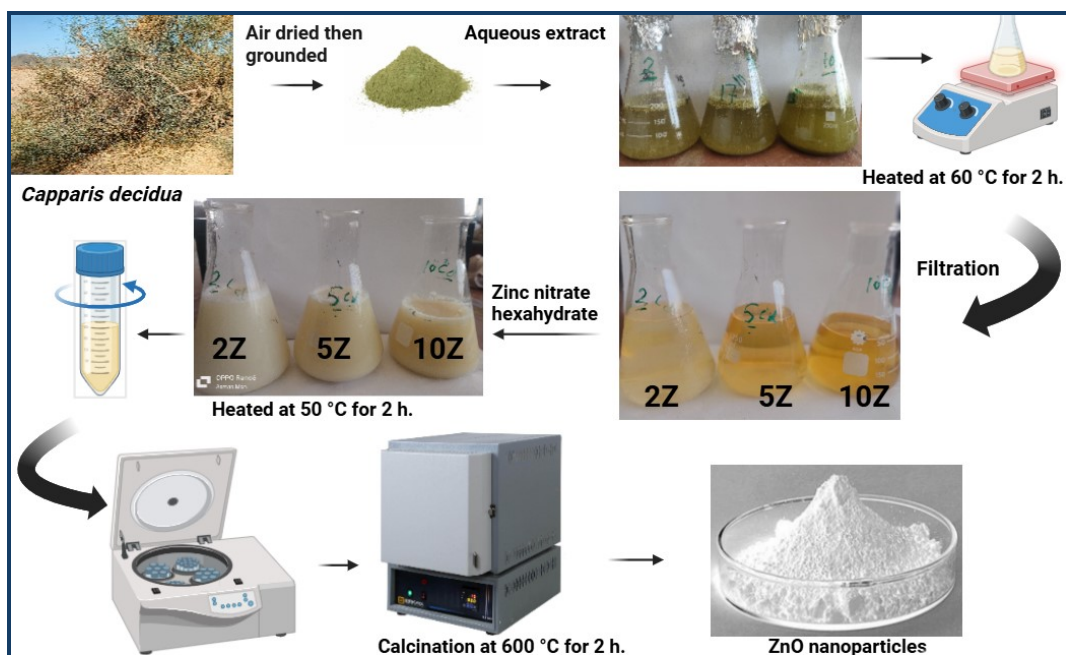

**Fig. S1** Schematic illustration for the green synthesis of ZnO NPs.

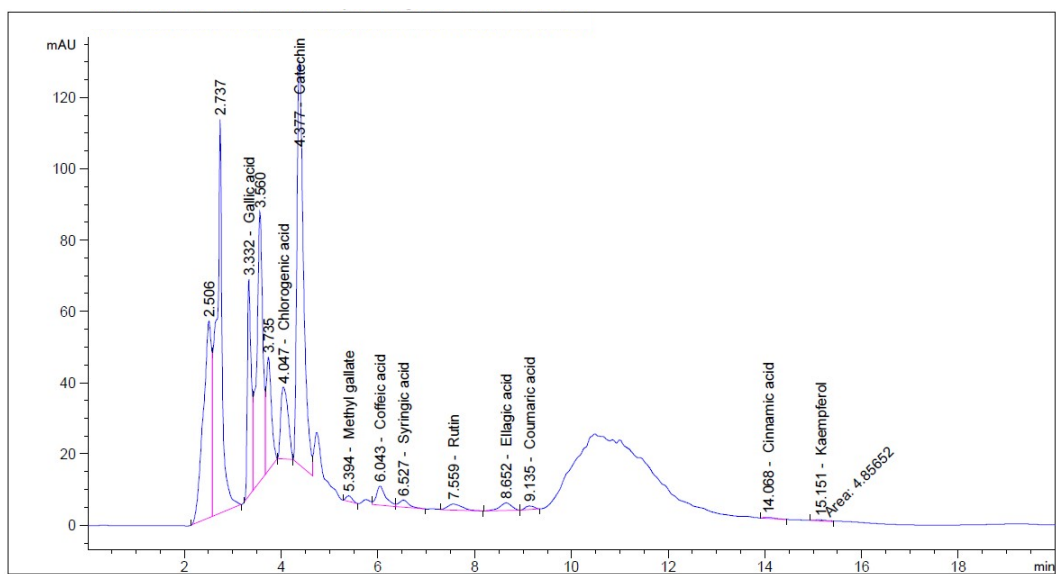

**Figure S2.** HPLC chromatogram of the *Capparis Decidua* extract.

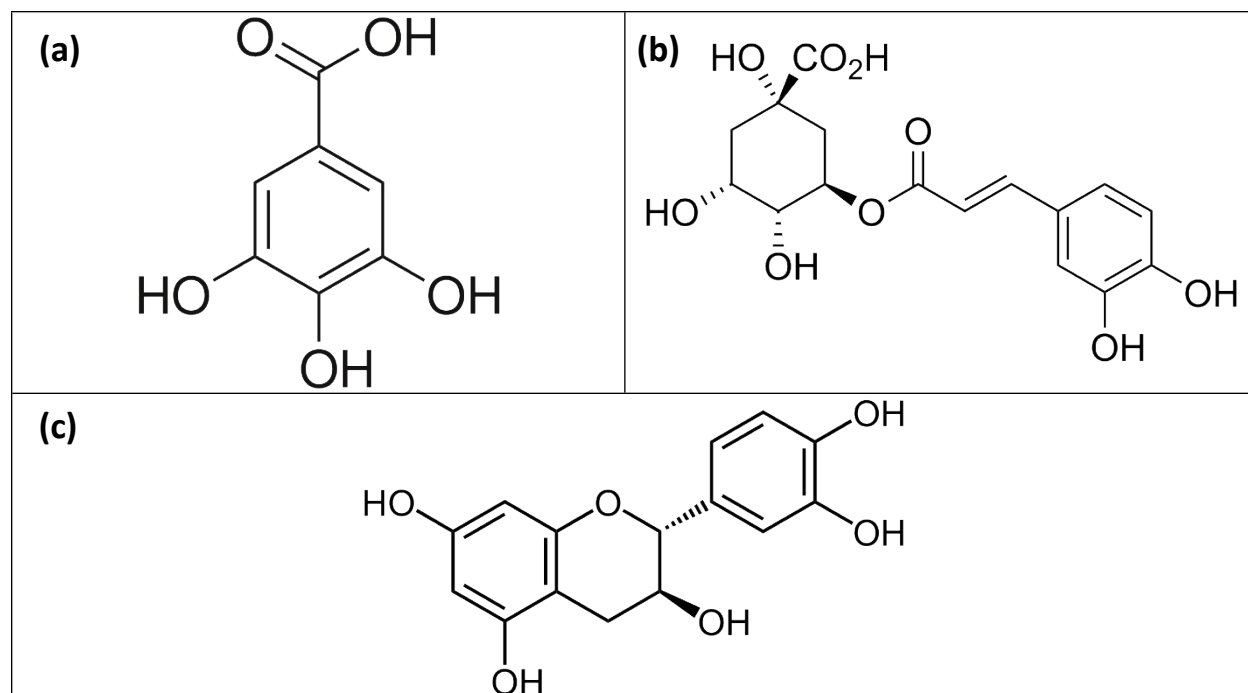

**Figure S3.** Chemical structure of a) Gallic acid, b) Chlorogenic acid, and c) Catechin.

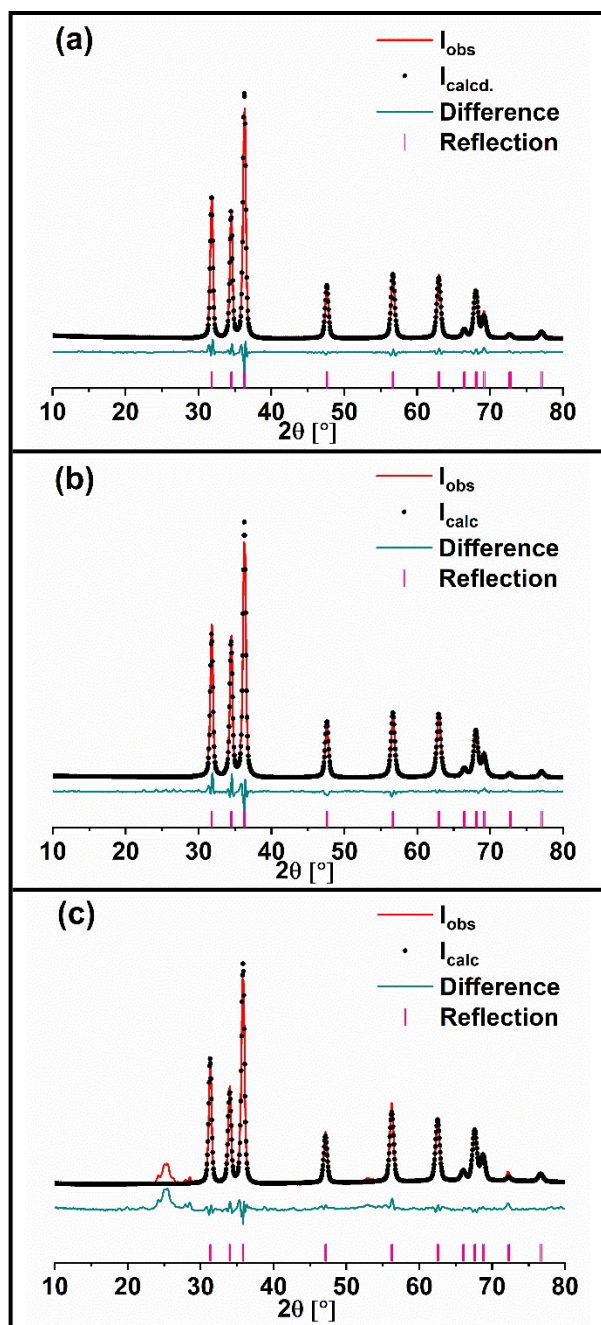

**Fig. S4** Rietveld analysis for the XRD patterns of the three ZnO samples prepared using different plant extract concentrations: a) 2Z, b) 5Z and c) 10Z.

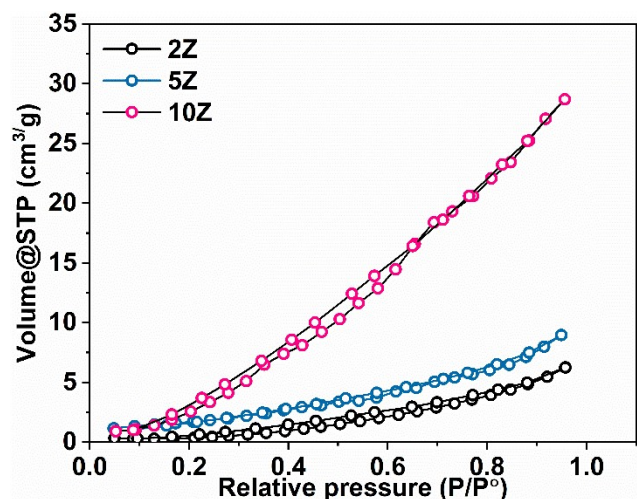

**Fig. S5** Nitrogen adsorption-desorption isotherms of ZnO NPs prepared using different plant extracts.

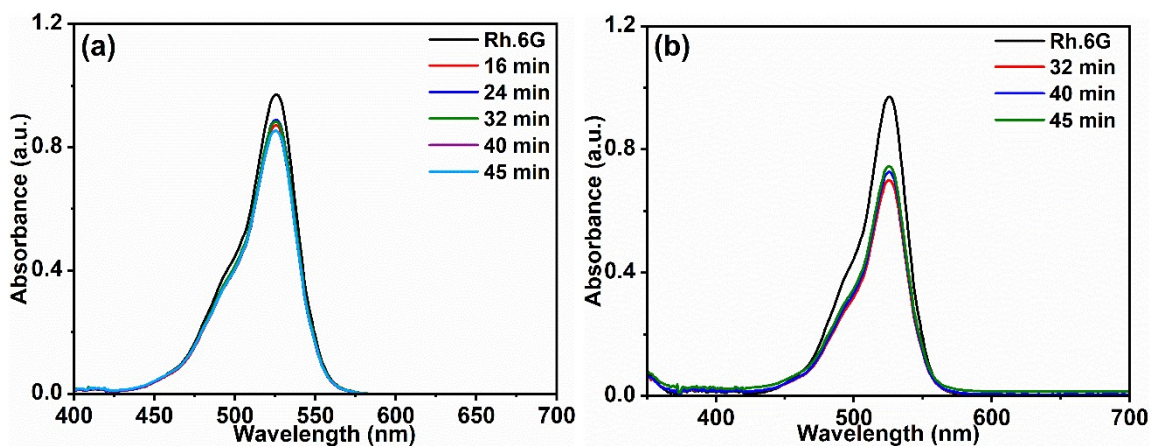

**Fig. S6** UV-Vis spectra of a) Rh 6G subjected to sunlight for 45 min, and b) dark part experiment for Rh 6G removal using 50 mg ZnO NPs.



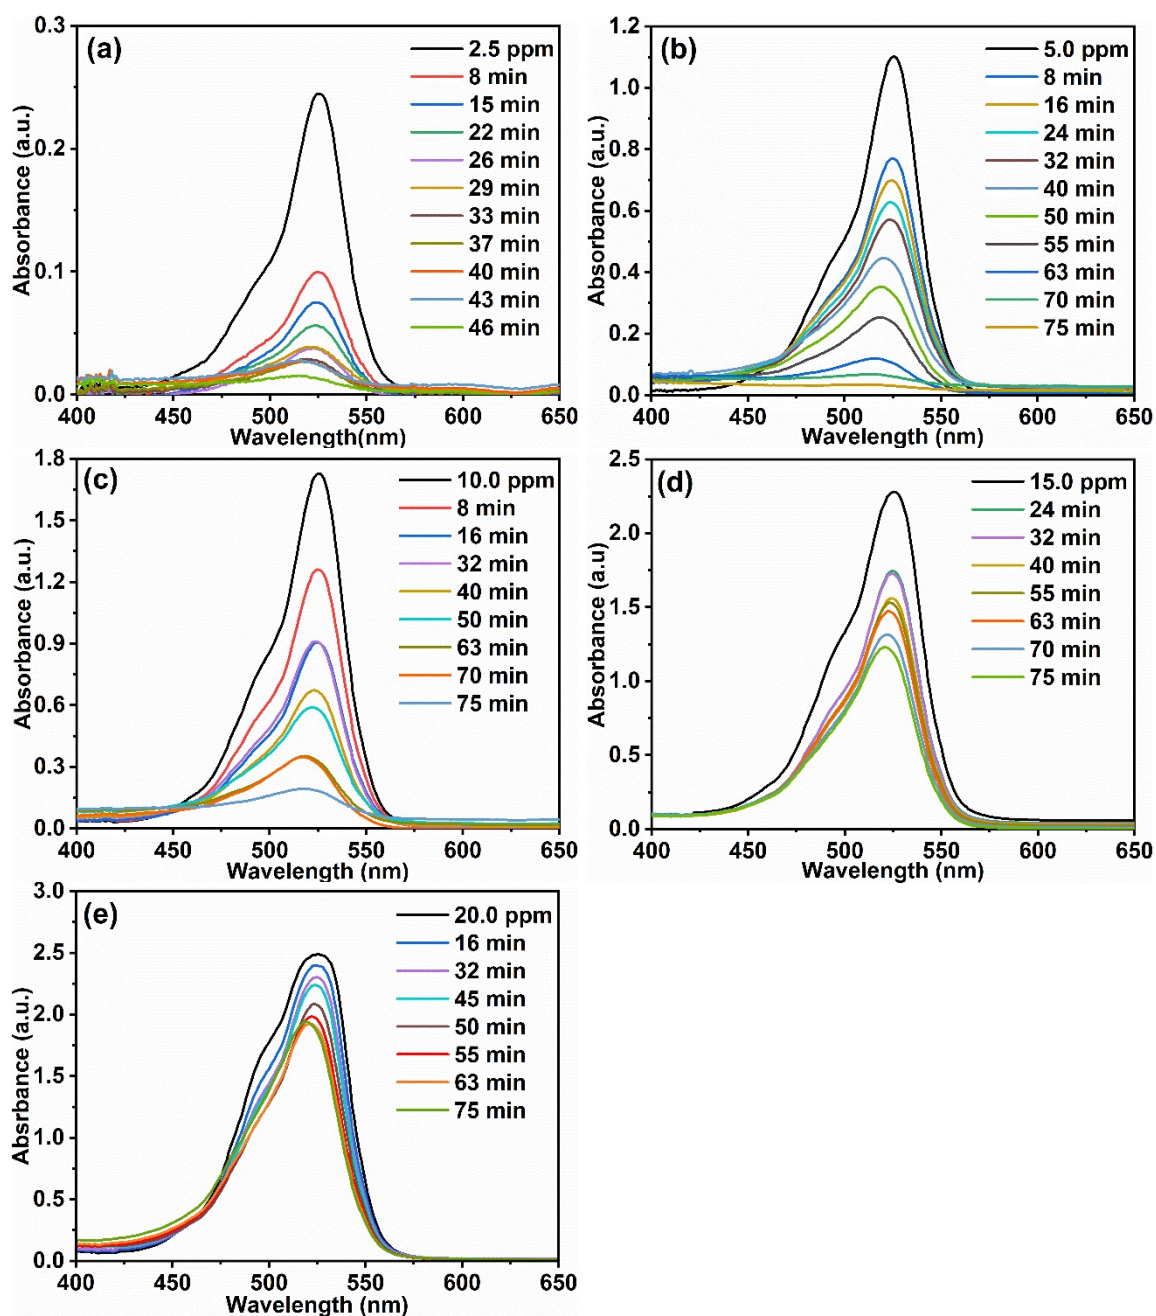

**Fig. S7** Uv-Vis spectra showing the effect of dye concentration on the degradation of 50 mL Rh 6G while using 50 mg of ZnO NPs (sample 2Z) as photocatalyst.

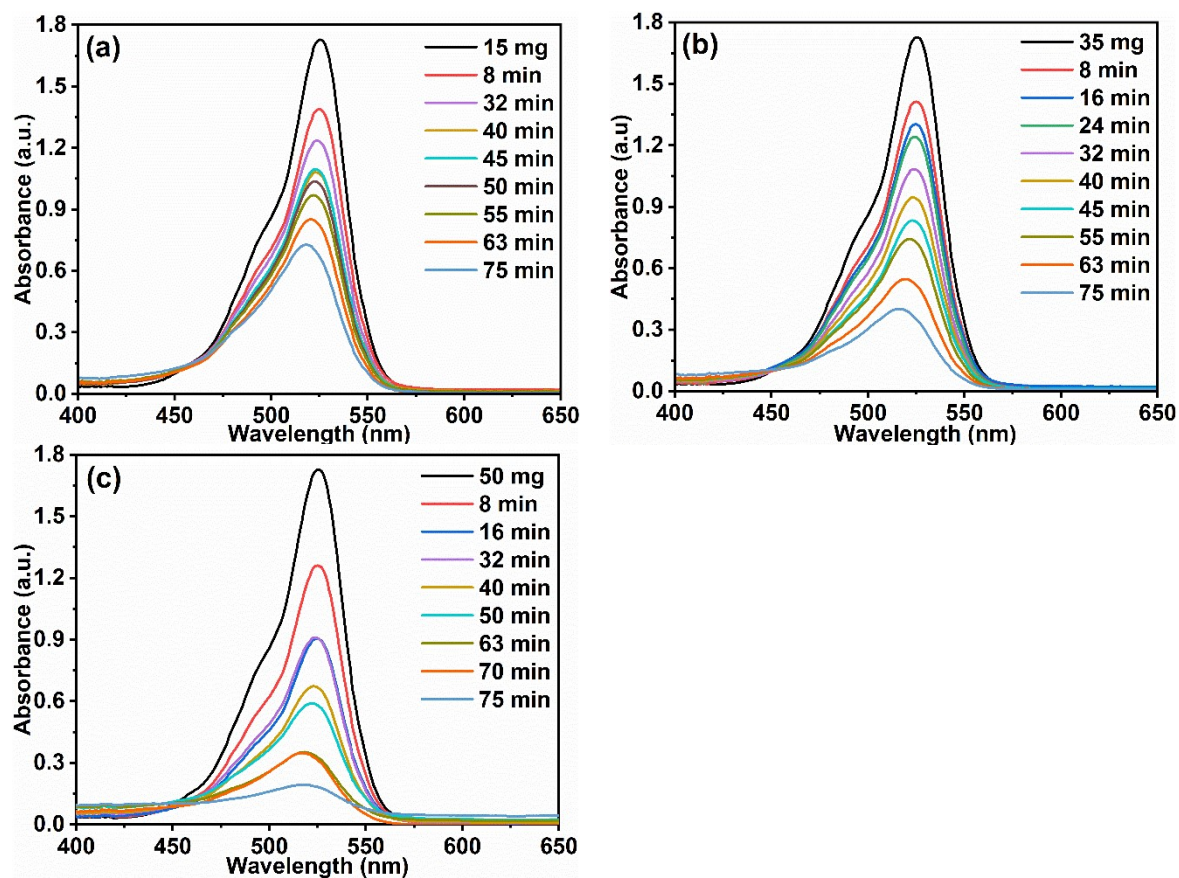

**Fig. S8** Uv-Vis spectra showing the effect of ZnO NPs (sample **2Z**) dose on the photocatalytic degradation of 50 mL Rh 6G (10.0 ppm).

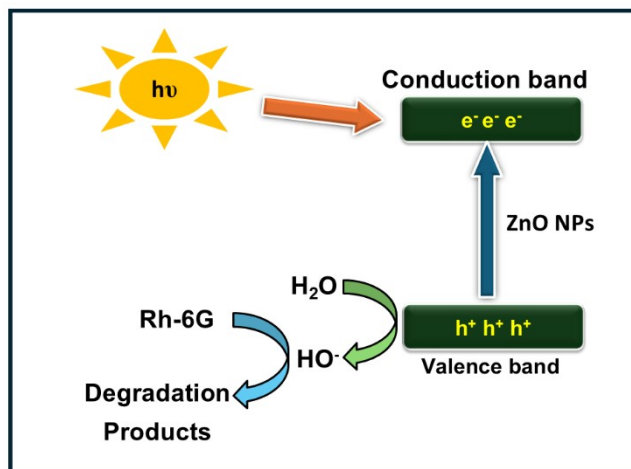

**Fig. S9** Production of hydroxyl radical ( $^\bullet OH$ ) occurs in aqueous medium.
